# Supplementary material for: COVID-19 vaccination rates among health care workers by immigrant background. A nation-wide registry study from Norway
Source: bioRxiv or medRxiv preprint supplement (doi:10.1101/2021.09.17.21263619), 2021-09-21

Supplementary figure 1: Percent vaccinated HCW over time by occupation in Norway 2021. X-axis: calendar weeks in 2021.

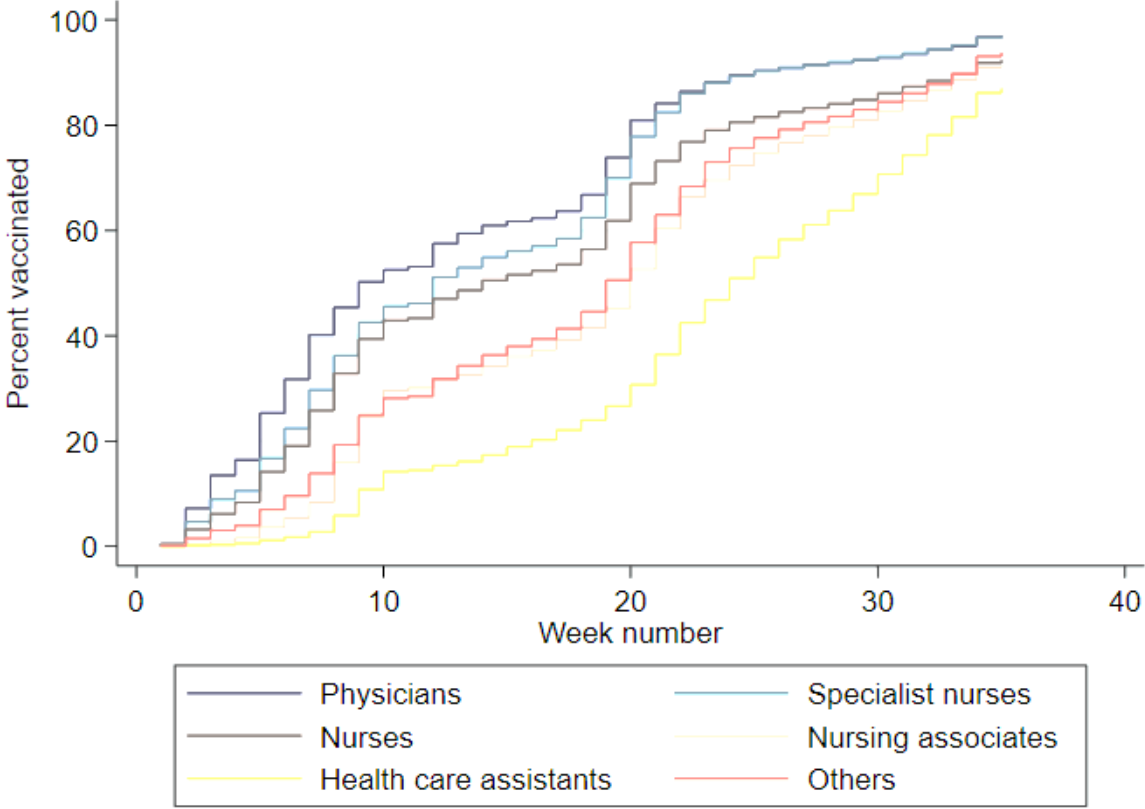

Supplement: Supplementary file [file media-1.pdf]
